# Supplementary material for: AZD2014, an Inhibitor of mTORC1 and mTORC2, Is Highly Effective in ER+ Breast Cancer When Administered Using Intermittent or Continuous Schedules
Source: Oxford University Press journal article supplement (doi:10.1158/1535-7163.mct-15-0365), 2015-09-11
Supplement: 15357163mct150365-sup-149234_2_supp_3108998_ntbxk9.docx [file 15357163mct150365-sup-149234_2_supp_3108998_ntbxk9.docx]

**Supplementary figure 1 - Guichard *et al*.**

**Supplementary figure 1: HCC1428-eveR and HCC1428-LTED-eveR cell lines resistant to everolimus remain sensitive to dual mTORC1/2 inhibitor AZD2014.**

(A) Colony formation assay. Indicated derivatives of HCC1428 cells were plated at low density, treated with everolimus (500nM), AZD2014 (500nM) or a vehicle control (DMSO) and harvested 3 weeks post-plating.

(B) Three-dimensional matrigel assay. Indicated derivatives of HCC1428 cells were plated in matrigel and treated with everolimus (500nM), AZD2014 (500nM) or a vehicle control (DMSO). Representative photographs were taken five days post-treatment (20X magnification).

**(A) (B)**
