# Supplementary material for: AZD2014, an Inhibitor of mTORC1 and mTORC2, Is Highly Effective in ER+ Breast Cancer When Administered Using Intermittent or Continuous Schedules
Source: Oxford University Press journal article supplement (doi:10.1158/1535-7163.mct-15-0365), 2015-09-11
Supplement: 15357163mct150365-sup-149234_2_supp_3109002_ntbxx8.docx [file 15357163mct150365-sup-149234_2_supp_3109002_ntbxx8.docx]

**Supplementary figure 2 - Guichard *et al*.**

**Supplementary figure 2: Pharmacokinetics and PK/PD relationships for AZD2014**.

(A) Oral pharmacokinetics of AZD2014. Symbols are means, error bars are+/- standard errors of the means. Solid lines are fits of a linear two compartment model with first order absorption as described in the main text.

(B) PK/PD modelling (p-AKT) (C) PK/PD modelling (p-S6). Symbols are means with error bars being +/- standard errors of the means. Solid lines are model fit of a direct response model as described in the main text.

**(A)**

**
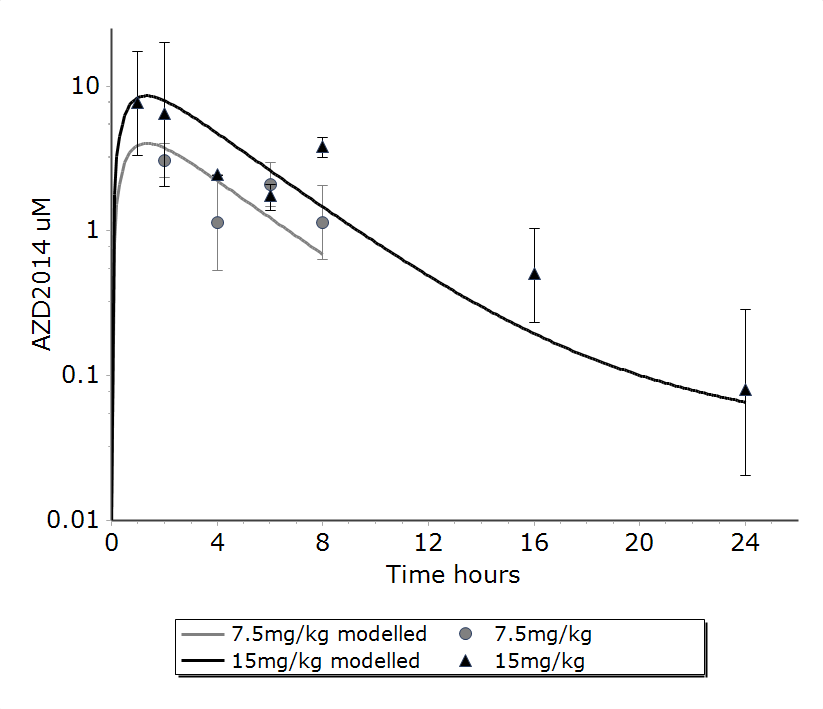
**

**(B)**

**(C)**

**
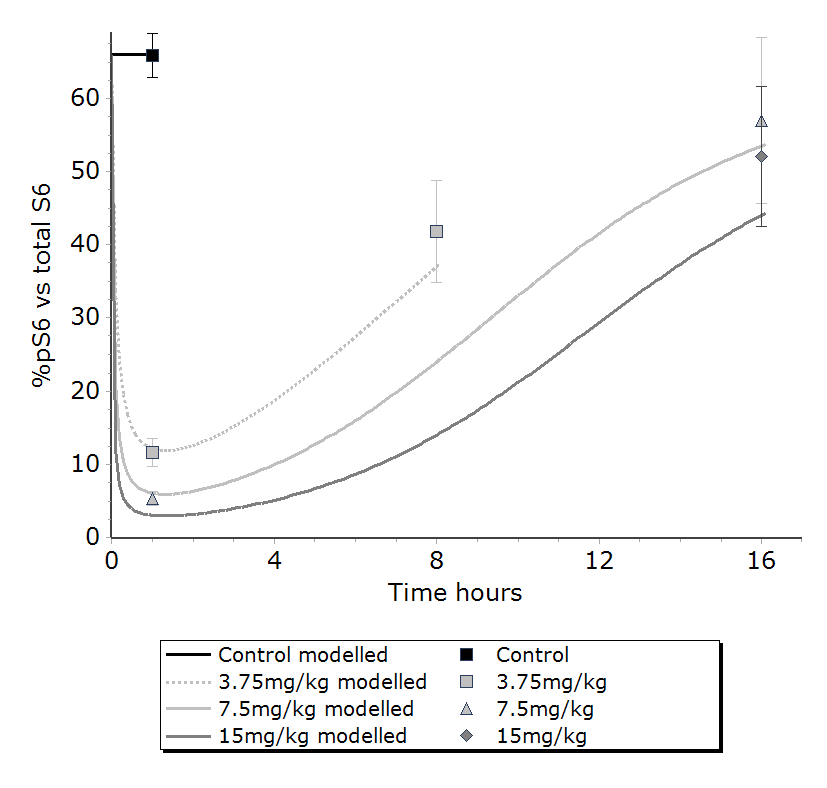
**
