# Supplementary material for: AZD2014, an Inhibitor of mTORC1 and mTORC2, Is Highly Effective in ER+ Breast Cancer When Administered Using Intermittent or Continuous Schedules
Source: Oxford University Press journal article supplement (doi:10.1158/1535-7163.mct-15-0365), 2015-09-11

**Supplementary figure 3. Guichard *et al****.*

**Supplementary figure 3: Pharmacokinetics modelling of AZD2014 intermittent dosing schedule.**

Observed data are symbols with error bars being +/- standard error of the mean. Solid lines are the model fit of a two compartment model with first order absorption. The model is the same as shown in supplementary figure 2A.


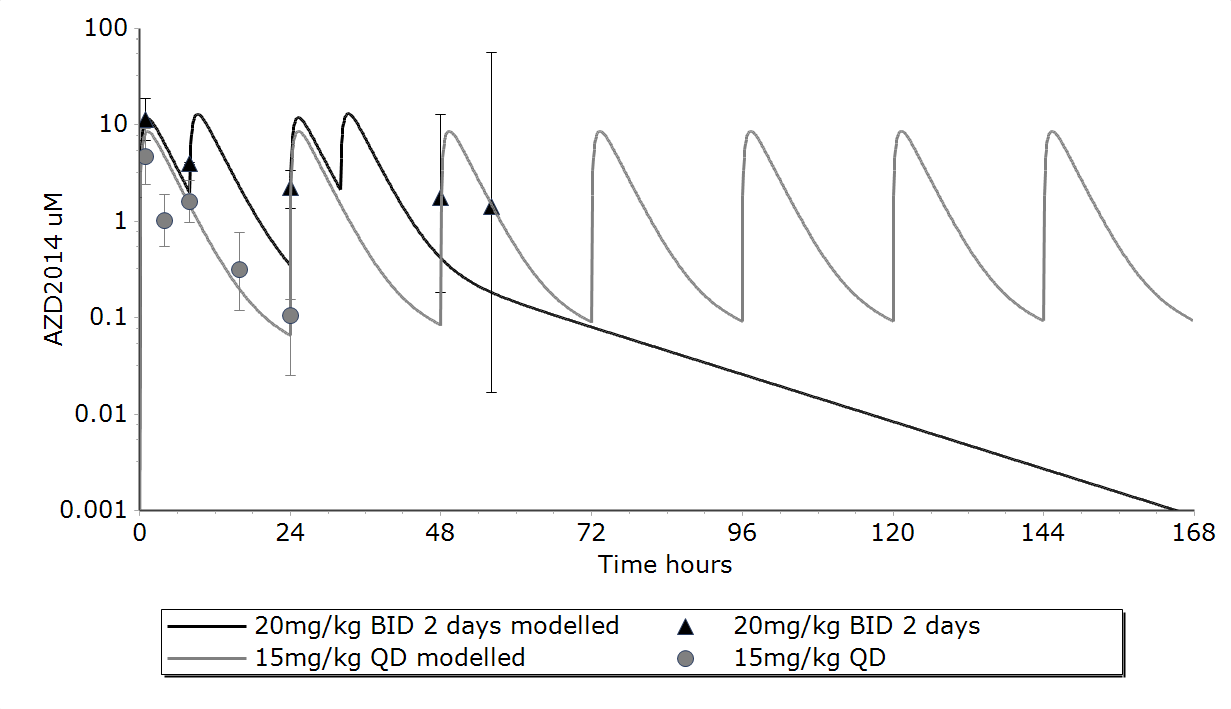

Supplement: 15357163mct150365-sup-149234_2_supp_3109003_ntbxz7.docx [file 15357163mct150365-sup-149234_2_supp_3109003_ntbxz7.docx]
