# Supplementary material for: AZD2014, an Inhibitor of mTORC1 and mTORC2, Is Highly Effective in ER+ Breast Cancer When Administered Using Intermittent or Continuous Schedules
Source: Oxford University Press journal article supplement (doi:10.1158/1535-7163.mct-15-0365), 2015-09-11
Supplement: 15357163mct150365-sup-149234_2_supp_3109004_ntby39.docx [file 15357163mct150365-sup-149234_2_supp_3109004_ntby39.docx]

**Supplementary figure 4. Guichard *et al.***

**Supplementary figure 4: Gene expression changes in response to AZD2014, fulvestrant and the combination.**

Genes significantly modulated compared to vehicle group (* p<0.05, Fold change higher or smaller than 1.5), by either AZD2014, fulvestrant or the combination group.
