# Supplementary material for: AZD2014, an Inhibitor of mTORC1 and mTORC2, Is Highly Effective in ER+ Breast Cancer When Administered Using Intermittent or Continuous Schedules
Source: Oxford University Press journal article supplement (doi:10.1158/1535-7163.mct-15-0365), 2015-09-11
Supplement: 15357163mct150365-sup-149234_2_supp_3109010_ntby9y.xlsx [file 15357163mct150365-sup-149234_2_supp_3109010_ntby9y.xlsx]

## Sheet: Sheet1
Cell Line	Tissue	TGI (uM)	GI50 (uM)	Source	ID testing method	Date obtained
ZR-75-1	breast	0.05239	0.02504	ATCC	STR Analysis	1986-04-17
OCI-Ly4	Haems	0.0608	0.02648	Ontario Cancer Institute	STR Analysis	2009-07-02
TMD8	Haems	0.08716	0.02519	Daniel Krappmann	STR Analysis	2011-10-12
PFEIFFER	Haems	0.1048	0.01988	ATCC	STR Analysis	2012-07-19
SUM52PE	breast	0.1293	0.06242	Asterand	STR Analysis	2007-02-27
HCC1419	breast	0.1402	0.1008	ATCC	STR Analysis	2010-02-23
CAMA-1	breast	0.141	0.03941	ATCC	STR Analysis	2008-06-10
NIH:OVCAR-3	ovary	0.1421	0.05068	ATCC	STR Analysis	2009-06-17
T47D	breast	0.1427	0.06044	ATCC	STR Analysis	1993-10-20
HCC1569	breast	0.1582	0.06284	ATCC	STR Analysis	2008-04-01
HLY-1	Haems	0.1718	0.09775	Louis Staudt	STR Analysis	2012-10-15
HCC1187	breast	0.1796	0.04749	ATCC	STR Analysis	2012-08-14
SU-DHL-6	Haems	0.1902	0.07612	DSMZ	STR Analysis	2005-09-29
MOLM-16	Haems	0.1941	0.06941	DSMZ	STR Analysis	2005-12-14
MCF7	breast	0.218	0.04915	DSMZ	STR Analysis	2004-03-05
SU-DHL-8	Haems	0.2222	0.05597	DSMZ	STR Analysis	2013-04-12
MDA-MB-157	breast	0.2391	0.0415	ATCC	STR Analysis	1993-10-08
RPMI 8226	Haems	0.2741	0.09076	ATCC	STR Analysis	1997-02-04
RI1	Haems	0.2784	0.05725	DSMZ	STR Analysis	2013-03-05
SK-BR-3	breast	0.2784	0.1206	ATCC	STR Analysis	1985-12-19
HuP-T4	pancreas	0.2861	0.09523	ECACC	STR Analysis	2012-06-27
KG-1	Haems	0.2886	0.06445	ATCC	STR Analysis	1993-03-12
MV-4-11	Haems	0.3175	0.06951	ATCC	STR Analysis	2012-08-14
MDA-MB-453	breast	0.3228	0.1618	ATCC	STR Analysis	1996-06-04
Panc 10.05	pancreas	0.3431	0.07499	ATCC	STR Analysis	2011-10-21
OCI-Ly3	Haems	0.3511	0.08642	Louis Staudt	STR Analysis	2012-09-28
CMK	Haems	0.3599	0.1561	DSMZ	STR Analysis	2005-11-23
Panc 08.13	pancreas	0.371	0.1047	ATCC	STR Analysis	2012-07-03
NCI-H520	lung	0.3765	0.1032	ATCC	STR Analysis	2010-05-05
OCI-Ly1	Haems	0.4062	0.04269	DSMZ	STR Analysis	2008-12-16
LNCaP clone FGC	prostate	0.4093	0.07596	ATCC	STR Analysis	2012-08-14
WILL-2	Haems	0.4152	0.05962	DSMZ	STR Analysis	2012-06-29
MOLP-8	Haems	0.4173	0.1044	DSMZ	STR Analysis	2005-08-04
SNU-398	liver	0.4221	0.1061	ATCC	STR Analysis	2011-04-04
LK-2	lung	0.4247	0.0484	Riken	STR Analysis	2013-04-26
MOLM-13	Haems	0.4589	0.1019	DSMZ	STR Analysis	2004-08-03
NCI-H1869	lung	0.4899	0.07953	ATCC	STR Analysis	2005-05-27
MGH-U3	bladder	0.5135	0.2009	University of Leeds	STR Analysis	2012-09-28
OCI-LY-19	Haems	0.5142	0.05945	DSMZ	STR Analysis	2005-01-24
97-7	bladder	0.5427	0.1652	Dr Margaret Knowles, University of Leeds, UK	STR Analysis	2010-09-23
22Rv1	prostate	0.605	0.1054	ATCC	STR Analysis	2002-01-24
OCI-Ly10	Haems	0.615	0.1442	Louis Staudt	STR Analysis	2008-12-16
SNU-5	Gastric	0.637	0.1352	ATCC	STR Analysis	2006-05-09
MKN1	Gastric	0.6648	0.1576	Riken	STR Analysis	2012-06-27
JEKO-1	Haems	0.6683	0.07214	ATCC	STR Analysis	2005-09-28
L-363	Haems	0.6972	0.1062	DSMZ	STR Analysis	2005-08-04
RERF-LC-Sq1	lung	0.7065	0.1491	JCRB	STR Analysis	2011-11-07
SNU-878	liver	0.7112	0.2059	KCLB	STR Analysis	2012-06-27
RT4	bladder	0.7498	0.1949	ATCC	STR Analysis	1999-02-08
Capan-2	pancreas	0.7558	0.1439	ATCC	STR Analysis	1987-06-01
HS766T	pancreas	0.785	0.1525	ATCC	STR Analysis	2009-08-21
HEL9217	Haems	0.7865	0.1135	JCRB	STR Analysis	1996-07-03
U-2940	Haems	0.788	0.1312	DSMZ	STR Analysis	2011-10-20
SU-DHL-2	Haems	0.8056	0.2446	ATCC	STR Analysis	2011-09-10
OCI-Ly7	Haems	0.8068	0.1355	DSMZ	STR Analysis	2009-05-19
SU-DHL-4	Haems	0.8238	0.07481	DSMZ	STR Analysis	2004-10-01
23132/87	Gastric	0.8285	0.114	DSMZ	STR Analysis	2005-12-14
RS4;11	Haems	0.8385	0.08253	ATCC	STR Analysis	2012-07-19
GTL16	Gastric	0.84	0.174	Institute for Cancer Research and Treatment (IRC)	STR Analysis	2005-06-16
RC-K8	Haems	0.8512	0.1204	DSMZ	STR Analysis	2012-06-27
WILL-1	Haems	0.8715	0.1559	DSMZ	STR Analysis	2012-06-29
DOHH2	Haems	0.878	0.07984	DSMZ	STR Analysis	2004-10-04
Hep 3B	liver	0.9018	0.1999	ATCC	STR Analysis	2009-05-27
MDA-MB-468	breast	0.907	0.3451	ATCC	STR Analysis	1991-11-14
NCI-H596	lung	0.9521	0.1847	ATCC	STR Analysis	2003-05-13
JIMT-1	breast	0.9608	0.2044	DSMZ	STR Analysis	2006-01-13
HT	Haems	0.9842	0.04503	ATCC	STR Analysis	2005-09-26
AMO-1	Haems	0.9967	0.2477	DSMZ	STR Analysis	2005-08-04
HCCC9810	liver	0.9993	0.2201	SIBS	STR Analysis	2012-09-28
HCC1954	breast	1.008	0.3188	ATCC	STR Analysis	2012-08-14
U-937	Haems	1.017	0.1737	ATCC	STR Analysis	1984-07-25
WSU-DLCL-2	Haems	1.046	0.1236	DSMZ	STR Analysis	2005-09-26
HBL-1	Haems	1.064	0.05175	Daniel Krappmann	STR Analysis	2011-10-12
BT-549	breast	1.087	0.3076	ATCC	STR Analysis	2008-06-06
KARPAS-422	Haems	1.214	0.06299	DSMZ	STR Analysis	2004-06-10
BT-20	breast	1.223	0.372	ATCC	STR Analysis	1986-06-18
MHCC97L	liver	1.226	0.2148	Zhongshan Hospital	STR Analysis	2008-01-01
TCCSUP	bladder	1.254	0.2271	ATCC	STR Analysis	2012-07-19
NCI-H2286	lung	1.336	0.09611	ATCC	STR Analysis	2012-08-14
IM95m	Gastric	1.346	0.07829	JCRB	STR Analysis	2012-06-27
QGP-1	pancreas	1.394	0.2727	JCRB	STR Analysis	2011-10-04
NCI-H1703	lung	1.407	0.1361	ATCC	STR Analysis	2004-11-05
OE33	esophagus	1.424	0.1769	ECACC	STR Analysis	2011-02-21
HPAF-II	pancreas	1.468	0.2183	ATCC	STR Analysis	2009-07-29
MDA-MB-436	breast	1.503	0.1344	ATCC	STR Analysis	2009-04-15
EBC-1	lung	1.547	0.3627	JCRB	STR Analysis	2011-09-09
HCC1937	breast	1.592	0.2526	ATCC	STR Analysis	2009-05-05
PC-3	prostate	1.675	0.2951	ATCC	STR Analysis	1990-04-10
SK-MES-1	lung	1.737	0.1763	ATCC	STR Analysis	2012-10-21
OCI-Ly8	Haems	1.741	0.1902	Louis Staudt	STR Analysis	2012-09-28
NCI-H226	lung	1.8	0.2205	ATCC	STR Analysis	2010-02-10
NCI-H647	lung	1.816	0.2732	ATCC	STR Analysis	2004-10-27
COLO 205	colon	1.892	0.2984	ATCC	STR Analysis	1990-05-30
HuH-7	liver	1.911	0.224	Riken	STR Analysis	2001-05-09
NCI-H2170	lung	1.936	0.5062	ATCC	STR Analysis	2010-06-26
Ramos	Haems	2.084	0.1068	ATCC	STR Analysis	1992-12-16
PNT1A	prostate	2.098	0.2309	ECACC	STR Analysis	1998-11-13
HT-1197	bladder	2.147	0.4365	ATCC	STR Analysis	2006-11-30
SNU-886	liver	2.252	0.2869	KCLB	STR Analysis	2012-06-27
Panc 02.03	pancreas	2.268	0.1735	ATCC	STR Analysis	2008-10-08
THP-1	Haems	2.467	0.08524	ATCC	STR Analysis	1997-10-21
BxPC-3	pancreas	2.587	0.2947	ATCC	STR Analysis	2004-02-20
AGS	Gastric	2.652	0.1937	ATCC	STR Analysis	1992-03-12
Reh	Haems	2.829	0.3775	ATCC	STR Analysis	1996-01-29
MIA PaCa-2	pancreas	2.832	0.3291	ATCC	STR Analysis	1989-07-12
HT-1376	bladder	2.936	0.5485	ATCC	STR Analysis	2006-11-17
Hs 746T	Gastric	3.03	0.1309	ATCC	STR Analysis	1990-02-01
Panc 03.27	pancreas	3.092	0.2172	ATCC	STR Analysis	2012-07-19
Mono-Mac-6	Haems	3.279	0.2104	DSMZ	STR Analysis	1998-11-12
SNU-354	liver	3.416	0.1844	KCLB	STR Analysis	2013-04-20
SNU-761	liver	3.868	0.2297	KCLB	STR Analysis	2012-06-27
Capan-1	pancreas	4.084	0.1343	ATCC	STR Analysis	1993-08-09
OE19	esophagus	4.243	0.2844	ECACC	STR Analysis	2011-02-22
SU-DHL-10	Haems	4.357	0.4709	DSMZ	STR Analysis	2011-10-12
JJN-3	Haems	4.44	0.3926	DSMZ	STR Analysis	2005-08-04
U-2932	Haems	4.548	0.1257	DSMZ	STR Analysis	2012-06-27
SNU-449	liver	4.954	0.441	ATCC	STR Analysis	2012-07-19
CFPAC-1	pancreas	4.962	0.2677	ATCC	STR Analysis	2000-10-06
OCI-AML2	Haems	5.232	0.1825	DSMZ	STR Analysis	2005-12-07
AsPC-1	pancreas	5.358	0.1228	ATCC	STR Analysis	1990-09-07
HCC1395	breast	5.429	0.5616	ATCC	STR Analysis	2010-09-15
SW 780	bladder	5.437	0.4293	ATCC	STR Analysis	2009-05-20
HGC-27	Gastric	6.026	0.1361	ECACC	STR Analysis	2005-11-22
HPAC	pancreas	7.577	0.1801	ATCC	STR Analysis	2005-05-12
BEL7405	liver	7.618	0.2026	SIMM	STR Analysis	2008-06-01
SNU-16	Gastric	7.89	0.3222	ATCC	STR Analysis	2008-03-12
PANC-89	pancreas	7.997	0.2336	DSMZ	STR Analysis	1999-07-14
HuH-1	liver	8.175	0.2962	JCRB	STR Analysis	2011-03-17
Nomo-1	Haems	8.741	0.1112	DSMZ	STR Analysis	2005-12-06
SW-1710	bladder	9.493	0.4177	DSMZ	STR Analysis	2009-07-29
HCC95	lung	9.538	0.2765	KCLB	STR Analysis	2011-03-01
BEL7404	liver	9.574	0.239	SIMM and Beijing	STR Analysis	2008-05-01
Jurkat	Haems	9.817	0.3104	DSMZ	STR Analysis	1990-10-01
VM-CUB-1	bladder	10.44	0.4308	DSMZ	STR Analysis	2009-07-28
KATO III	Gastric	11.56	0.3025	ATCC	STR Analysis	1990-01-29
UM-UC-3	bladder	12.56	0.3038	ATCC	STR Analysis	2006-10-30
RT112/84	bladder	16.2	0.4652	ECACC	STR Analysis	2006-10-26
J82	bladder	17.36	0.7068	ATCC	STR Analysis	2006-11-08
QGY7703	liver	18.12	0.5551	SIBS	STR Analysis	2008-01-01
DU 145	prostate	18.34	0.3627	DSMZ	STR Analysis	1990-10-16
Panc 04.03	pancreas	18.57	0.3323	ATCC	STR Analysis	2012-07-19
SK-HEP-1	liver	19.43	0.6013	ATCC	STR Analysis	1999-03-03
T3M4	pancreas	19.44	0.2527	Riken	STR Analysis	1999-07-26
SW 900	lung	22.72	0.5458	ATCC	STR Analysis	2003-09-28
5637	bladder	30	0.6969	ATCC	STR Analysis	1988-02-24
647-V	bladder	30	0.4758	DSMZ	STR Analysis	2009-09-25
A2058	skin	30	1.96	ATCC	STR Analysis	2009-11-26
AZ-521	colon	30	0.2274	JCRB	STR Analysis	2012-06-27
BFTC-905	bladder	30	0.7352	DSMZ	STR Analysis	2009-07-21
Calu-1	lung	30	0.6216	ATCC	STR Analysis	1990-04-06
HARA	lung	30	0.3596	JCRB	STR Analysis	2011-08-18
HCC-15	lung	30	0.6687	DSMZ	STR Analysis	2011-09-07
HCC1806	breast	30	0.5486	ATCC	STR Analysis	2009-05-29
Hep G2	liver	30	1.635	ATCC	STR Analysis	1997-05-16
HLE	liver	30	0.5055	JCRB	STR Analysis	2011-03-18
HLF	liver	30	0.9696	JCRB	STR Analysis	2011-03-17
HuP-T3	pancreas	30	0.2893	ECACC	STR Analysis	2012-10-21
K-562	Haems	30	1.232	ATCC	STR Analysis	2009-04-22
KP-4	pancreas	30	0.527	JCRB	STR Analysis	2011-09-22
KU-19-19	bladder	30	0.4169	DSMZ	STR Analysis	2009-07-30
LUDLU-1	lung	30	1.727	ECACC	STR Analysis	2012-06-27
MKN74	Gastric	30	30	Riken	STR Analysis	2012-06-27
NUGC-3	Gastric	30	0.2127	JCRB	STR Analysis	2012-06-27
NUGC-4	Gastric	30	0.2782	Riken	STR Analysis	2012-06-27
OCUM-1	Gastric	30	0.409	JCRB	STR Analysis	2012-06-27
PAMC82	Gastric	30	7.197	HSRRB	STR Analysis	2008-06-01
PANC-1	pancreas	30	1.958	ATCC	STR Analysis	1990-01-29
RERF-LC-AI	lung	30	0.6786	JCRB	STR Analysis	2002-08-12
SCaBER	bladder	30	0.6697	ATCC	STR Analysis	2012-07-19
SMMC7721	liver	30	17.91	SIMM	STR Analysis	2008-06-01
SNU-1	Gastric	30	0.2206	ATCC	STR Analysis	2008-03-16
SNU-216	Gastric	30	0.5634	KCLB	STR Analysis	2008-03-12
SNU-368	liver	30	0.9573	KCLB	STR Analysis	2012-06-27
SNU-484	Gastric	30	0.2409	KCLB	STR Analysis	2012-06-27
SNU-601	Gastric	30	0.2174	KCLB	STR Analysis	2008-03-20
SNU-620	Gastric	30	0.3931	KCLB	STR Analysis	2008-03-20
SNU-638	Gastric	30	0.1963	KCLB	STR Analysis	2008-03-21
SNU-668	Gastric	30	0.1783	KCLB	STR Analysis	2013-02-13
SNU-739	liver	30	0.5268	KCLB	STR Analysis	2012-06-27
SU.86.86	pancreas	30	2.078	ATCC	STR Analysis	2008-09-22
SW 1990	pancreas	30	0.4786	ATCC	STR Analysis	2008-10-14
T24	bladder	30	0.5401	ATCC	STR Analysis	2009-05-20
YAPC	pancreas	30	0.2039	DSMZ	STR Analysis	2011-07-25
HCC-1500				ATCC	STR Analysis	2009-05-04
HCC1428				Prof. Carlos Arteaga	STR Analysis	2013-04-20
HCC1428/LTED				Prof. Carlos Arteaga	STR Analysis	2013-04-20
ZR75-1				Prof. Carlos Arteaga	STR Analysis	2009-04-28
ZR75-1/LTED				Prof. Carlos Arteaga	STR Analysis	2009-05-14
MCF7-T52				Prof. Toshi Shioda	STR Analysis	2009-11-19
MCF7-40-6				Prof. Toshi Shioda	STR Analysis	2009-11-19
MCF7-100-16				Prof. Toshi Shioda	STR Analysis	2009-11-19
